# Supplementary material for: V5+ degradation of sulfonated Radel membranes for vanadium redox flow batteries
Source: Royal Society of Chemistry journal article supplement (doi:10.1039/c3cp52035h), 2013-01-01
Supplement: c3cp52035h.pdf [file c3cp52035h.pdf]

## V<sup>5+</sup> Degradation of Sulfonated Radel Membranes

### for Vanadium Redox Flow Batteries

*Dongyang Chen, Michael A. Hickner*

### Electronic Supplementary Material

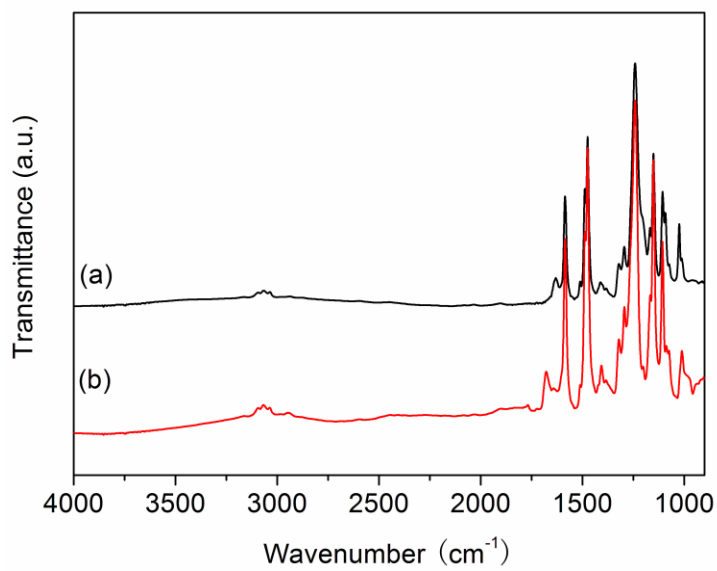

**Figure S1.** FTIR spectra of (a) S-Radel and (b) degraded S-Radel.

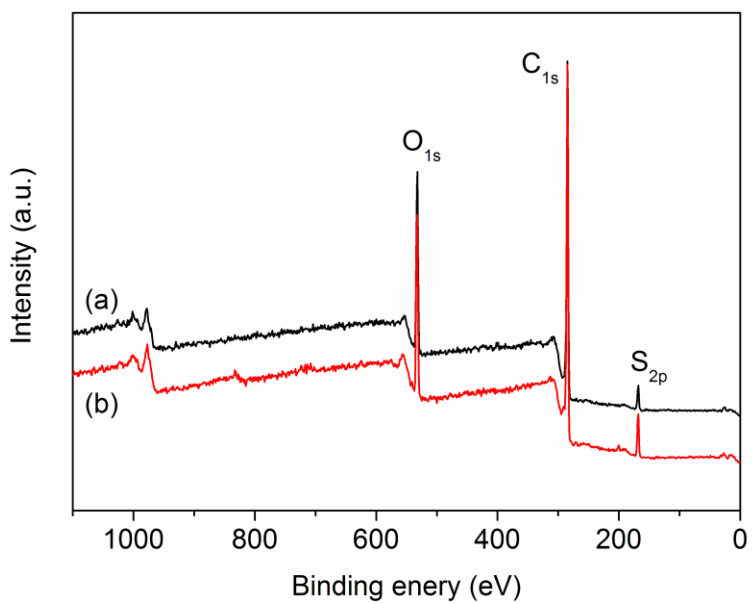

**Figure S2.** Survey scan XPS spectra of (a) S-Radel and (b) degraded S-Radel.

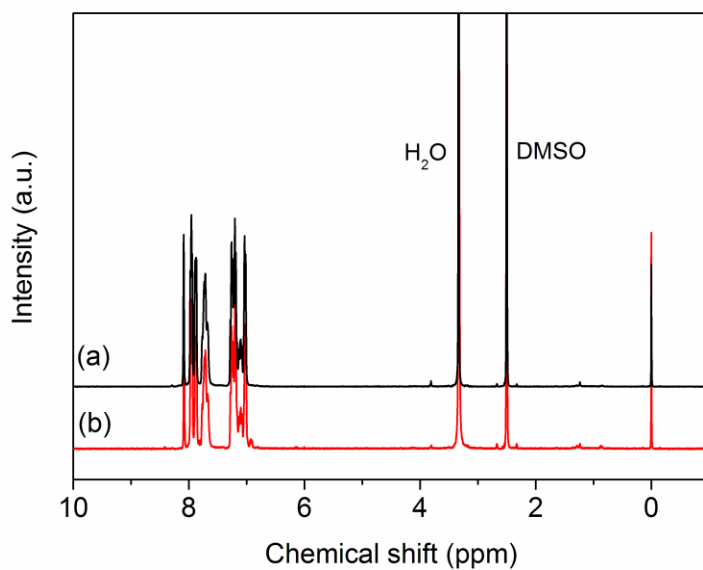

**Figure S3.** <sup>1</sup>H NMR spectra of (a) S-Radel and (b) degraded S-Radel in DMSO-d<sub>6</sub>.

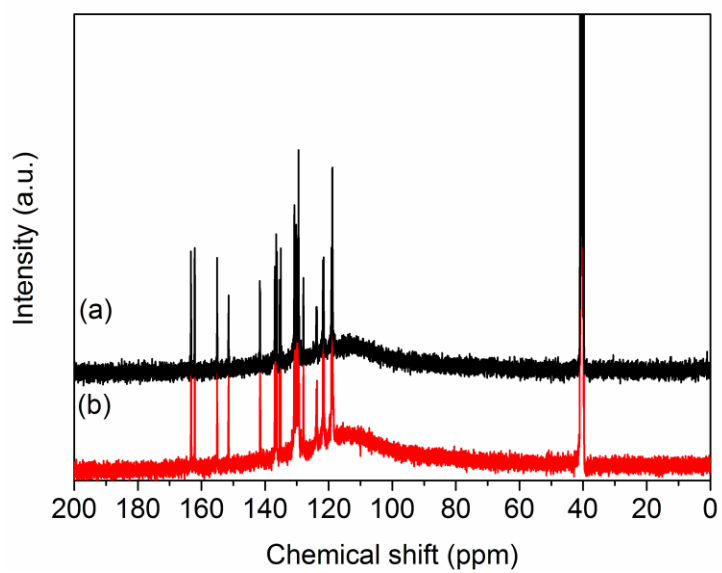

Figure S4.  $^{13}\text{C}$  NMR of (a) S-Radel and (b) degraded S-Radel in  $\text{DMSO-d}_6$ .
